# Supplementary material for: Atmospheric significance of aeolian salts in the sandy deserts of northwestern China
Source: Copernicus journal article supplement (doi:10.5194/se-7-191-2016), 2016-02-04
Supplement: Supplementary file 1 [file se-7-191-2016-supplement.zip]

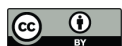

## *Supplement of*

# **Atmospheric significance of aeolian salts in the sandy deserts of northwestern China**

**B.-Q. Zhu**

*Correspondence to:* B.-Q. Zhu (zhubingqi@igsnr.ac.cn)

- se-7-191-2016-supplement-title-page.pdf
- On-line Supplementary Table 1.docx
- On-line Supplementary Table 2.docx
- On-line Supplementary Table 3.docx
- On-line Supplementary Table 4.docx

The copyright of individual parts of the supplement might differ from the CC-BY 3.0 licence.
